# Supplementary material
Source: Springer Nature journal article supplement (https://www.springermedizin.de/resource/supplementary/12887_2013_1045_MOESM2_ESM.pdf/9476374)
Supplement: MOESM2 [file 9476374]

Study population

**546,000 populations**  
- 107,428 MWRA

MWRA follow up

**35096 MWRA became pregnant during study period**  
- 34619 women became pregnant once  
- 468 women became pregnant twice  
- 8 women became pregnant three times  
- 1 woman became pregnant four times

Pregnant women follow up

**37,105 deliveries recorded**  
- 36589 singleton } Yielding 37,630 pregnancy outcomes  
- 507 twin }  
- 9 triplets }

**37,630 pregnancy outcomes**  
- 279 abortions  
- 1443 still births  
- 35,908 live births

Live Births

**35,908 live born babies**

Exclusion

**3782 babies were excluded for not having reported LMP date from maternal interview**

Included in this analysis

**32,126 live births with reported LMP**

**Preterm**

Number =7,161  
Proportion among all live birth =22.3%

**Born at Term**

Number = 24,965  
Proportion among all live birth = 77.7%

**Late Preterm**

- Number = 3,943
- Proportion among all preterm birth = 55.1%
- Proportion among all live birth =12.3%

**Moderate Preterm**

- Number = 2,280
- Proportion among all preterm birth = 31.8%
- Proportion among all live birth = 7.1%

**Very Preterm**

- Number = 938
- Proportion among all preterm birth = 13.1%
- Proportion among all live birth = 2.9%
